# Supplementary material for: Gingival solitary chemosensory cells are immune sentinels for periodontitis
Source: PubMed Central journal article supplement (PMC6776549; doi:10.1038/s41467-019-12505-x), 2019-10-03
Supplement: 41467_2019_12505_MOESM3_ESM.pdf [file 41467_2019_12505_MOESM3_ESM.pdf]

## Reporting Summary

Nature Research wishes to improve the reproducibility of the work that we publish. This form provides structure for consistency and transparency in reporting. For further information on Nature Research policies, see [Authors & Referees](#) and the [Editorial Policy Checklist](#).

### Statistics

For all statistical analyses, confirm that the following items are present in the figure legend, table legend, main text, or Methods section.

n/a Confirmed

- The exact sample size ( $n$ ) for each experimental group/condition, given as a discrete number and unit of measurement
- A statement on whether measurements were taken from distinct samples or whether the same sample was measured repeatedly
- The statistical test(s) used AND whether they are one- or two-sided  
*Only common tests should be described solely by name; describe more complex techniques in the Methods section.*
- A description of all covariates tested
- A description of any assumptions or corrections, such as tests of normality and adjustment for multiple comparisons
- A full description of the statistical parameters including central tendency (e.g. means) or other basic estimates (e.g. regression coefficient) AND variation (e.g. standard deviation) or associated estimates of uncertainty (e.g. confidence intervals)
- For null hypothesis testing, the test statistic (e.g.  $F$ ,  $t$ ,  $r$ ) with confidence intervals, effect sizes, degrees of freedom and  $P$  value noted  
*Give  $P$  values as exact values whenever suitable.*
- For Bayesian analysis, information on the choice of priors and Markov chain Monte Carlo settings
- For hierarchical and complex designs, identification of the appropriate level for tests and full reporting of outcomes
- Estimates of effect sizes (e.g. Cohen's  $d$ , Pearson's  $r$ ), indicating how they were calculated

*Our web collection on [statistics for biologists](#) contains articles on many of the points above.*

### Software and code

Policy information about [availability of computer code](#)

Data collection

no software was used

Data analysis

For 16S rDNA sequencing data, statistical analyses were performed with I-Sangers online tools (<http://www.i-sanger.com/>). The differences in beta diversity (revealed by PCA) within groups were compared with ANOSIM and Adonis; the alpha diversity data and genus-level microbial composition data were analyzed by Wilcoxon rank-sum test. Statistical analyses of other data were performed with Prism software.  
 Image J from NIH (<https://imagej.nih.gov/ij/>)  
 Image pro plus 6.0 from Media Cybernetics  
 Trimmomatic (Bolger et al., 2014)  
 FLASH (Magoc and Salzberg, 2011)  
 Usearch version 7.1 from Drive5 (<http://drive5.com/uparse/>)  
 I-Sanger from Majorbio co (<http://www.i-sanger.com/>)  
 Prism software from GraphPad Software Inc.

For manuscripts utilizing custom algorithms or software that are central to the research but not yet described in published literature, software must be made available to editors/reviewers. We strongly encourage code deposition in a community repository (e.g. GitHub). See the Nature Research [guidelines for submitting code & software](#) for further information.

## Data

Policy information about [availability of data](#)

All manuscripts must include a [data availability statement](#). This statement should provide the following information, where applicable:

- Accession codes, unique identifiers, or web links for publicly available datasets
- A list of figures that have associated raw data
- A description of any restrictions on data availability

Microbiome sequencing data have been deposited in public database Sequence Read Archive (<http://www.ncbi.nlm.nih.gov/Traces/sra>) with accession numbers SRP126006 and SRP215896. All other data generated or analyzed during this study are included in this published article (and its extended data files).

## Field-specific reporting

Please select the one below that is the best fit for your research. If you are not sure, read the appropriate sections before making your selection.

- Life sciences       Behavioural & social sciences       Ecological, evolutionary & environmental sciences

For a reference copy of the document with all sections, see [nature.com/documents/nr-reporting-summary-flat.pdf](https://www.nature.com/documents/nr-reporting-summary-flat.pdf)

## Life sciences study design

All studies must disclose on these points even when the disclosure is negative.

|                 |                                                                                                                                       |
|-----------------|---------------------------------------------------------------------------------------------------------------------------------------|
| Sample size     | Sample sizes were chosen based on statistically significant results obtained in other publications that used similar methods.         |
| Data exclusions | No data were excluded.                                                                                                                |
| Replication     | All experiments were independently replicated at least 3 times.                                                                       |
| Randomization   | In the topical treatment experiment, mice were randomly assigned to (a) the denatonium treatment group, or (b) the PBS control group. |
| Blinding        | The investigators were blinded as to the strain of mice used (WT vs KO).                                                              |

## Reporting for specific materials, systems and methods

We require information from authors about some types of materials, experimental systems and methods used in many studies. Here, indicate whether each material, system or method listed is relevant to your study. If you are not sure if a list item applies to your research, read the appropriate section before selecting a response.

### Materials & experimental systems

|                                     |                                                                 |
|-------------------------------------|-----------------------------------------------------------------|
| n/a                                 | Involved in the study                                           |
| <input type="checkbox"/>            | <input checked="" type="checkbox"/> Antibodies                  |
| <input type="checkbox"/>            | <input checked="" type="checkbox"/> Eukaryotic cell lines       |
| <input checked="" type="checkbox"/> | <input type="checkbox"/> Palaeontology                          |
| <input type="checkbox"/>            | <input checked="" type="checkbox"/> Animals and other organisms |
| <input checked="" type="checkbox"/> | <input type="checkbox"/> Human research participants            |
| <input checked="" type="checkbox"/> | <input type="checkbox"/> Clinical data                          |

### Methods

|                                     |                                                 |
|-------------------------------------|-------------------------------------------------|
| n/a                                 | Involved in the study                           |
| <input checked="" type="checkbox"/> | <input type="checkbox"/> ChIP-seq               |
| <input checked="" type="checkbox"/> | <input type="checkbox"/> Flow cytometry         |
| <input checked="" type="checkbox"/> | <input type="checkbox"/> MRI-based neuroimaging |

## Antibodies

Antibodies used

Rabbit anti- $\alpha$ -gustducin antibody, Santa Cruz Biotechnology, Cat. no. SC-395, RRID: AB\_673678  
 Goat anti-Plc $\beta$ 2 antibody, Santa Cruz Biotechnology, Cat. no. SC-31759, RRID: AB\_2163242  
 Chicken anti-GFP antibody, Millipore, Cat. no. AB16901, RRID: AB\_11212200  
 Alex Fluor 594 donkey anti-rabbit IgG, Molecular Probes, Cat. no. A-21207, RRID: AB\_141637  
 Alex Fluor 488 donkey anti-goat IgG, Molecular Probes, Cat. no. A-11055, RRID: AB\_142672  
 Alex Fluor 488 donkey anti-chicken IgY, Jackson ImmunoResearch, Cat. no. 703-546-155, RRID: AB\_2340376

Validation

All antibodies were either validated by the manufacturers, or by the use of knockout animals for gustducin, or by the use of blocking peptides for Plc $\beta$ 2.

## Eukaryotic cell lines

Policy information about [cell lines](#)

|                                                                      |                                                                              |
|----------------------------------------------------------------------|------------------------------------------------------------------------------|
| Cell line source(s)                                                  | Human embryonic kidney 293 (HEK293) PEAKrapid cells, ATCC, Cat. no. CRL-2828 |
| Authentication                                                       | Authenticated by Manufacturer.                                               |
| Mycoplasma contamination                                             | Tested negative for mycoplasma by Manufacturer.                              |
| Commonly misidentified lines<br>(See <a href="#">ICLAC</a> register) | n/a                                                                          |

## Animals and other organisms

Policy information about [studies involving animals](#); [ARRIVE guidelines](#) recommended for reporting animal research

|                         |                                                                                                                                                                                                                                                                                                                                                                                                                                                                                                                                                                                                                                                                                |
|-------------------------|--------------------------------------------------------------------------------------------------------------------------------------------------------------------------------------------------------------------------------------------------------------------------------------------------------------------------------------------------------------------------------------------------------------------------------------------------------------------------------------------------------------------------------------------------------------------------------------------------------------------------------------------------------------------------------|
| Laboratory animals      | <p>These mouse strains were used:</p> <p>Wild-type mice (C57BL/6J background) from Jackson Lab., available at Monell Chemical Senses Center.</p> <p>Gnat3<sup>-/-</sup> mice (C57BL/6J background) available at Monell Chemical Senses Center (Wong et al., 1996)</p> <p>Pou2f3<sup>-/-</sup> mice (C57BL/6J background) from Dr. Ichiro Matsumoto, available at Monell Chemical Senses Center (Matsumoto et al., 2011)</p> <p>ChAT-GFP mice (FVB/N background) from Sukumar Vijayaraghavan, available at Monell Chemical Senses Center (Grybko et al., 2011)</p> <p>TrpM5-GFP mice (C57BL/6J background), available at Monell Chemical Senses Center (Clapp et al., 2006)</p> |
| Wild animals            | Wild animals not involved.                                                                                                                                                                                                                                                                                                                                                                                                                                                                                                                                                                                                                                                     |
| Field-collected samples | Samples collected from field not involved.                                                                                                                                                                                                                                                                                                                                                                                                                                                                                                                                                                                                                                     |
| Ethics oversight        | All animal experiments were performed in accordance with the National Institutes of Health guidelines for the care and use of animals in research and approved by the Institutional Animal Care and Use Committee at Monell Chemical Senses Center (ACC# 1184).                                                                                                                                                                                                                                                                                                                                                                                                                |

Note that full information on the approval of the study protocol must also be provided in the manuscript.
